# Supplementary material for: An AUC-based permutation variable importance measure for random forests
Source: PubMed Central journal article supplement (PMC3626572; doi:10.1186/1471-2105-14-119), 2013-04-05
Supplement: 1471-2105-14-119-S1.pdf [file 1471-2105-14-119-S1.pdf]

# Additional File 1

Performance comparison between the AUC-based permutation VIM and the error-rate-based permutation VIM computed using only observations from the minority class

I.

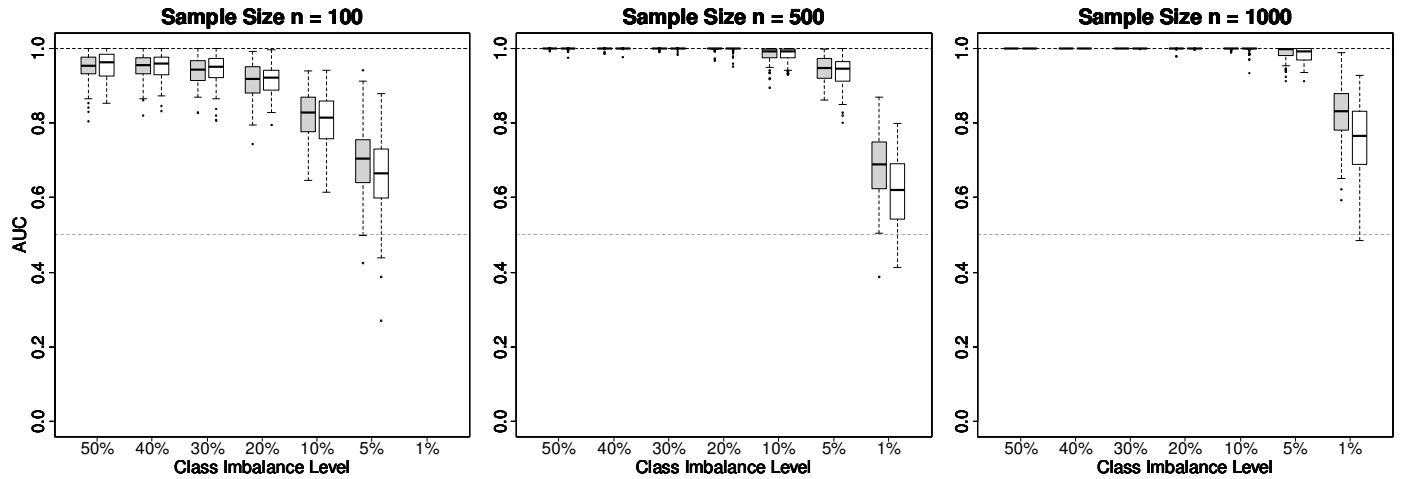

Distribution of AUC-values for 100 simulated datasets for AUC-based permutation VIM (filled) and error-rate-based permutation VIM computed using only observations from the minority class (unfilled) for different class imbalances. The AUC is used to assess the ability of a VIM to discriminate between predictors with an effect and predictors without an effect. Distributions are shown for total sample sizes of  $n = 100$  (left panel),  $n = 500$  (middle panel) and  $n = 1000$  (right panel).

II.

(a)

Sample Size n = 100

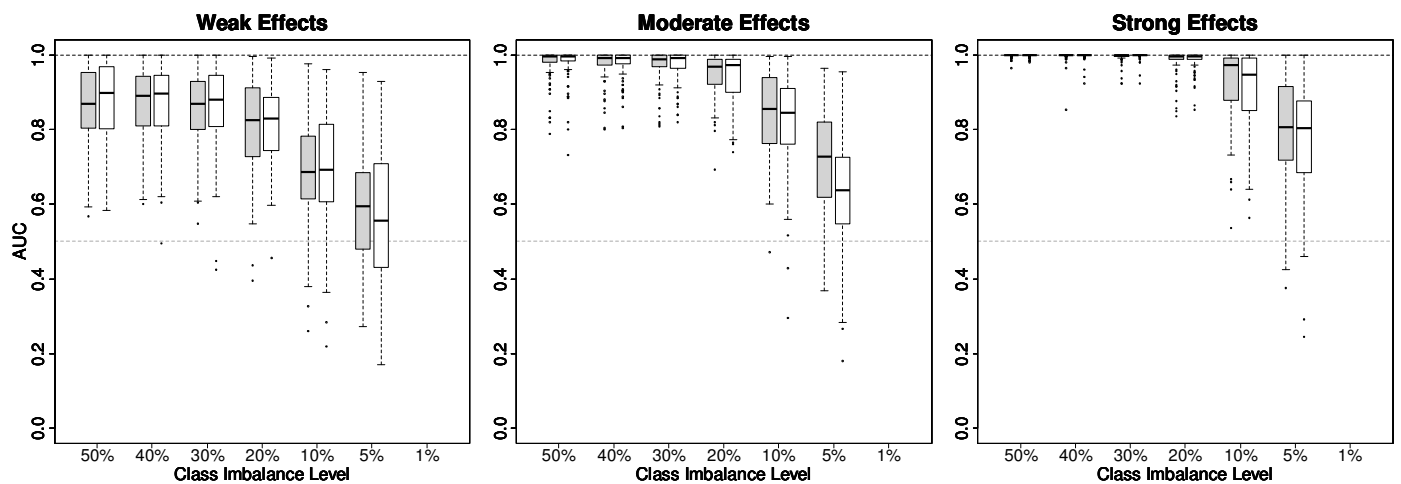

(b)

Sample Size  $n = 500$

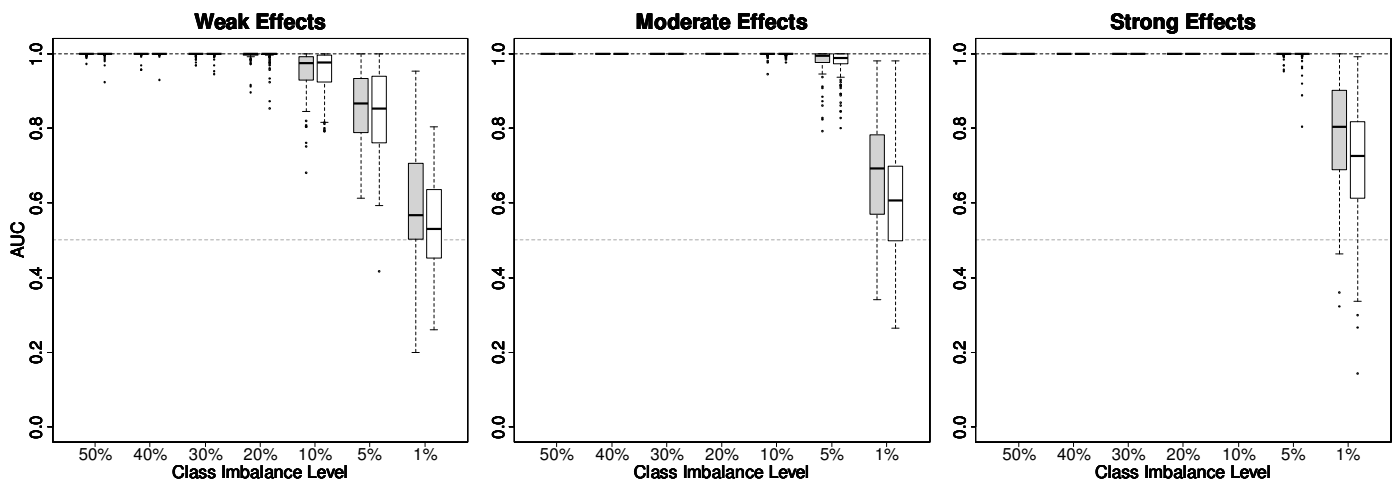

(c)

Sample Size  $n = 1000$

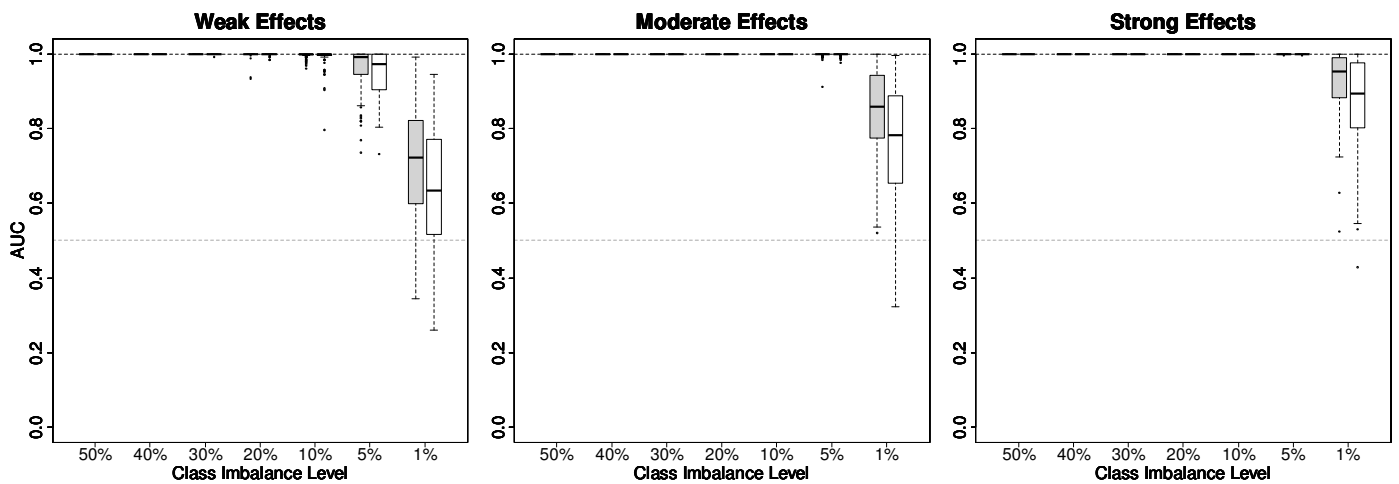

Distribution of AUC-values for 100 simulated datasets for AUC-based permutation VIM (filled) and error-rate-based permutation VIM computed using only observations from the minority class (unfilled) for different class imbalances. The AUC is used to assess the ability of a VIM to discriminate between noise predictors and predictors with a weak (left panel), moderate (middle panel) and strong (right panel) effect. Distributions are shown for a total sample size of (a)  $n = 100$ , (b)  $n = 500$  and (c)  $n = 1000$ .
