# Supplementary material for: An AUC-based permutation variable importance measure for random forests
Source: PubMed Central journal article supplement (PMC3626572; doi:10.1186/1471-2105-14-119), 2013-04-05
Supplement: 1471-2105-14-119-S2.pdf [file 1471-2105-14-119-S2.pdf]

## Additional File 2

Performance comparison between the AUC-based permutation VIM and the error-rate-based permutation VIM for sample sizes  $n = 500$  and  $n = 1000$

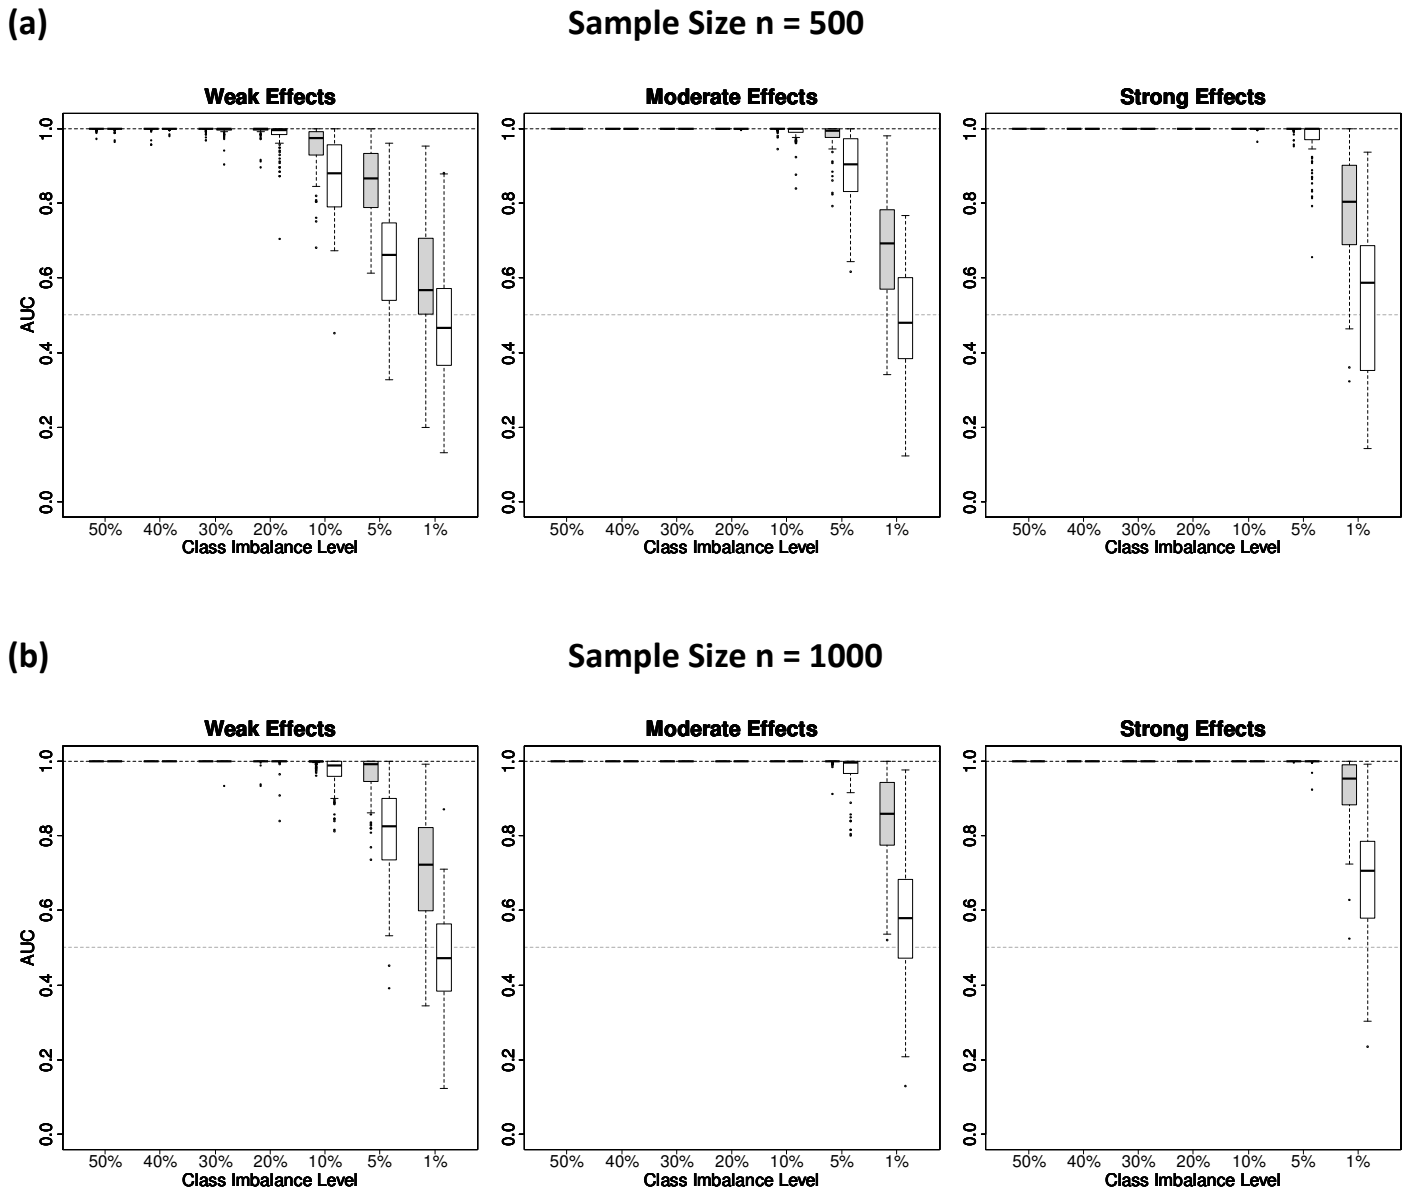

Distribution of AUC-values for 100 simulated datasets for AUC-based permutation VIM (filled) and error-rate-based permutation VIM (unfilled) for different class imbalances. The AUC is used to assess the ability of a VIM to discriminate between predictors with an effect and predictors without an effect. Distributions are shown for a total sample size of **(a)**  $n = 500$  and **(b)**  $n = 1000$ .
